# Lipid Droplets and Ferritin Heavy Chain: a Devilish Liaison in Cancer Radioresistance

L. Tirinato<sup>a, b, 1, 2</sup>, M.G. Marafioti<sup>a, b, 1</sup>, F. Pagliari<sup>a, 1, 2</sup>, J. Jansen<sup>a, c</sup>, I. Aversa<sup>a, b</sup>, R. Hanley<sup>a</sup>, C. Nisticò<sup>a, b</sup>, D. Garcia-Calderón<sup>a, c</sup>, G. Genard<sup>a</sup>, J. F. Guerreiro<sup>d</sup>, F.S. Costanzo<sup>b</sup>, and J. Seco<sup>a, c, 2</sup>

<sup>a</sup> Biomedical Physics in Radiation Oncology, German Cancer Research Center (DKFZ), Im Neuenheimer Feld 223, 69120 Heidelberg, Germany.

<sup>b</sup> Experimental and Clinical Medicine Department, University Magna Graecia of Catanzaro, 88100 Catanzaro, Italy.

<sup>c</sup> Department of Physics and Astronomy, Heidelberg University, Im Neuenheimer Feld 227, 69120 Heidelberg, Germany.

<sup>d</sup> Centro de Ciências e Tecnologias Nucleares, Instituto Superior Técnico, Universidade de Lisboa, 2695-066 Bobadela LRS, Portugal

<sup>1</sup> L.T., M.G.M and F.P. contributed equally to this work.

<sup>2</sup> To whom correspondence may be addressed. Email: [j.seco@dkfz.de](mailto:j.seco@dkfz.de), [tirinato@unicz.it](mailto:tirinato@unicz.it), [f.pagliari@dkfz.de](mailto:f.pagliari@dkfz.de).

## ORCID IDs

**L.T.:** 0000-0001-9826-2129; **M.G.M.:** 0000-0002-9469-2110; **F.P.:** 0000-0002-5547-222X; **J.J.:** 0000-0002-8625-3978; **I.A.:** 0000-0003-4721-6792; **R.H.:** 0000-0002-2627-1146; **C.N.:** 0000-0002-0787-9527; **J.G.:** 0000-0003-1960-603X; **J.S.:** 0000-0002-9458-2202.

## Abstract

Although much progress has been made in cancer treatment, the molecular mechanisms underlying cancer radioresistance (RR) as well as the biological characteristic of radioresistant cancer cells still need to be clarified. In this regard, we discovered that breast, bladder, lung, neuroglioma and prostate 6 Gy X-ray resistant cells were characterized by an increase of Lipid Droplet (LD) number and that the cells containing highest LDs showed the highest clonogenic potential after irradiation. Moreover, we observed that LD content was tightly connected with the iron metabolism and in particular with the presence of the ferritin heavy chain (FTH1). In fact, breast and lung cancer cells silenced for the FTH1 gene showed a reduction in the LD numbers and, by consequence, became radiosensitive. FTH1 restoration as well as iron-chelating treatment by Deferoxamine were able to restore the LD amount and RR. Overall, these results provide evidence of a novel molecular mechanism behind RR in which LDs and FTH1 are tightly connected to each other, a synergistic effect which might be worth deeply investigating in order to make cancer cells more radiosensitive and improve the efficacy of radiation treatments.

## Introduction

Since its first application in cancer treatment, radiotherapy has greatly improved from both a technical and a bio-clinical point of view, significantly increasing the treatment options and patient survival. Ionizing radiations (X-rays) work by damaging cell biomolecules, mostly DNA, which

43 eventually induce cell death. The molecular mechanisms activated by cancer cells in response to  
44 ionizing radiation are extensively investigated and many advances have been so far made, but  
45 considerably many questions are still unanswered and much remains poorly understood. Cancer  
46 cell radioresistance (RR) makes different tumor types difficult to treat. In this regard, the presence  
47 within the tumor mass of a small cell subpopulation called Cancer Stem Cells (CSCs) or Cancer  
48 Initiating-Cells (CICs) seems to represent one of the driving forces contributing to tumor resistance  
49 and recurrence after radiotherapy treatments <sup>1</sup>.

50 Recently, lipid metabolic reprogramming in cancer cells has become a central aspect of cancer  
51 aggressiveness <sup>2,3</sup>. In particular, an increase of small lipid organelles inside cancer cells, namely  
52 lipid droplets (LDs), has been shown to correlate with a CSC phenotype in colon <sup>4</sup> ovary <sup>5</sup>, breast <sup>6</sup>  
53 and glioblastoma <sup>7</sup>.

54 Cell survival upon radiation treatment is also modulated by several tumor parameters such as  
55 hypoxia, oxidative stress, inflammation, acidic stress, and low glucose, all of which have been  
56 reported to mediate their effects through iron metabolism <sup>8</sup>.

57 To date, altered expression and activity of many iron-related proteins in cancer cells have been  
58 reported and associated to cancer progression and metastasis <sup>9,10</sup>. In fact, an uncontrolled balance  
59 of iron results in the free radical production through the Fenton reaction ( $\text{Fe}^{2+} + \text{H}_2\text{O}_2 \rightarrow \text{Fe}^{3+} + \bullet\text{OH} + \text{OH}^-$ )  
60 and free radicals are considered strong contributors to tumor proliferation and  
61 aggressiveness <sup>11</sup>. Among all molecules involved in iron metabolism, ferritin is responsible for the  
62 cytoplasmic iron storage and the maintenance of the redox homeostasis. Ferritin is a protein  
63 complex composed of two chains, light (FTL) and heavy (FTH), and its clinical importance has been  
64 demonstrated in many cancers through multiple roles: the contribution to tumorigenesis, the  
65 restoration of tumor-dependent vessel growth and the association with tissue invasion <sup>8,12</sup>.  
66 Moreover, high levels of ferritin are often found in patients with various advanced cancers which  
67 could potentially be treated with radiotherapy <sup>13</sup>, although iron homeostasis is still poorly  
68 investigated in the context of radiation oncology.

69 A recently published paper highlighted a very intriguing relationship between iron balance and LDs.  
70 The Authors showed that iron depletion caused ER expansion and, as a consequence, LD  
71 accumulation into the cytoplasm of breast cancer cells <sup>14</sup>. These findings prompted us to investigate  
72 the LD role and the potential connections between FTH1, and indirectly iron balance, and LDs in  
73 various X-Ray-treated cancer cells with the aim at identifying possible shared features which can  
74 be targeted and manipulated to sensitize cells to the treatments.

75 This study demonstrates that radioresistant cancer cells of different origin (neuroglioma, lung,  
76 breast, bladder and prostate) were characterized by a higher expression of LDs. The subpopulation  
77 containing the highest amount of LDs (LD<sup>High</sup>) showed a higher clonogenic potential compared to  
78 the LD<sup>Low</sup> counterpart. Interestingly, the number of cytoplasmic LDs was directly correlated with the  
79 amount of FTH1. In fact, FTH1 knockdown in lung H460 (H460<sup>shFTH1</sup>) and breast MCF7  
80 (MCF7<sup>shFTH1</sup>) reduced the LD amount and increased the sensitivity to ionizing radiation. FTH1  
81 restoration as well as the treatment with an iron chelating agent in MCF7<sup>shFTH1</sup> and H460<sup>shFTH1</sup>  
82 restored the LD amount and increased their resistance to radiation treatment.

83 Altogether, these data provide evidence of a new pivotal role for LDs in cancer RR linking their  
84 expression with iron metabolism and specifically to FTH1 expression.

85

86 **Results**

87

88 **X-ray radiation treatment enhances Lipid Droplets**

89 To verify whether LD content was affected by ionizing radiation treatment, H4 (neuroglioma), H460  
 90 (lung), MCF7 (breast), PC3 (prostate) and T24 (bladder) cancer cells were treated with 6 Gy X-ray  
 91 and left in culture for 72 hours (hrs) in order to select only resistant/surviving cells. Treated and  
 92 untreated cancer cells were stained with LD540 and imaged at the confocal microscope for the  
 93 detection of LDs.

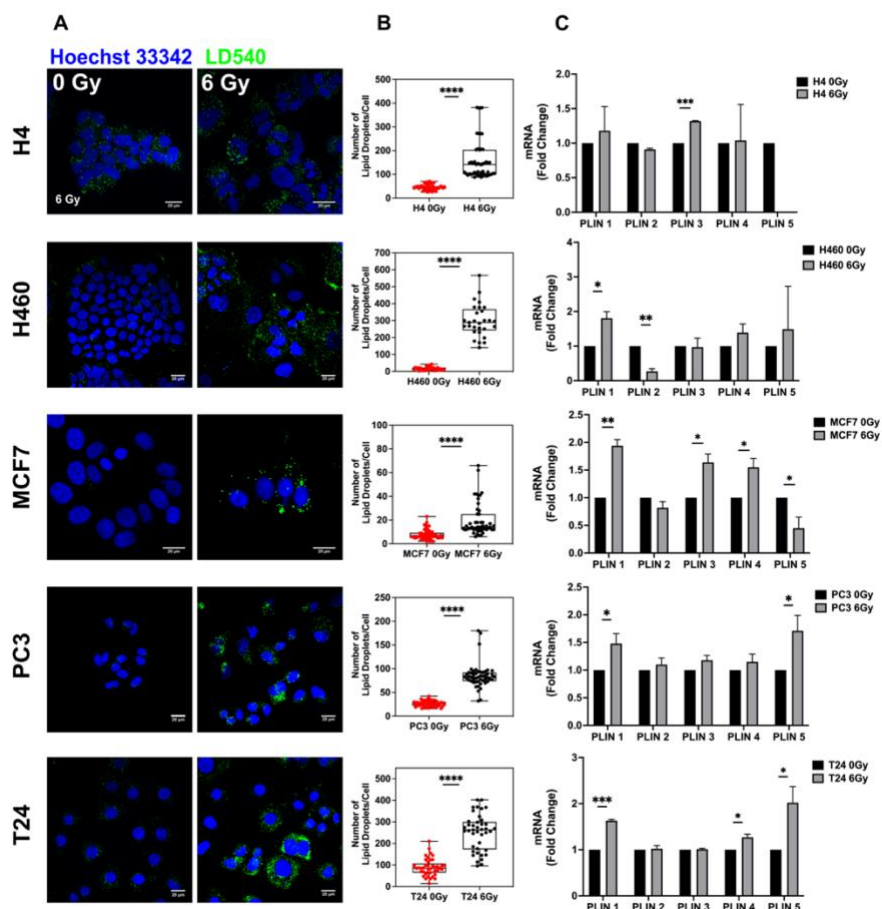

**Figure 1: Lipid Droplet detection in neuroglioma (H4), lung (H460), breast (MCF7), prostate (PC3) and bladder (T24) 6 Gy X-ray resistant cancer cells.** Cancer cells have been irradiated with 6 Gy X-ray and left in culture for 72 hrs. Afterwards, surviving and untreated cells have been stained with LD540 and imaged at the fluorescence confocal microscope. Z-projection of the z-stack acquisitions for untreated and 6 Gy treated cells are reported in column A (Scale bar, 20  $\mu$ M). B) For each cell line, 50 cells have been randomly imaged, and their LD number counted by using-Fiji software. C) qPCR analysis of the PLIN genes in the indicated cell lines. PLIN5 in the H4 6 Gy treated cells is not reported in the graph because it was not expressed. Error bars represent the means  $\pm$  SD from three independent experiments. \*  $\leq$  0.05; \*\*  $\leq$  0.01; \*\*\*  $\leq$  0.001 and \*\*\*\*  $\leq$  0.0001.

94

95 As shown by z-projection confocal microscopy images, surviving cancer cells were characterized  
 96 by a significant increase of LDs for all the aforementioned cell lines (Figure 1A). Although the LD  
 97 increase was a common feature observed in all cell lines, the relative LD ratio between treated and  
 98 untreated cells showed little differences, with H460 exhibiting the highest amount (Figure 1B). LD

99 modulation after radiation was further investigated at the gene level. Perilipin (PLIN) genes code  
100 for the proteins associated with LD surface and they are involved in their biogenesis as well as in  
101 several other roles<sup>15</sup>. Differences in tissue expression have been reported for all the PLIN genes  
102 (PLIN 1-5). Accordingly, we observed that, after 6 Gy radiation treatment, PLIN1 was up-regulated  
103 in H460, MCF7, PC3 and T24; PLIN2 was down-regulated in H460; PLIN3 showed mRNA  
104 increased expression in H4 and MCF7; PLIN4 expression was incremented in MCF7 and T24;  
105 PLIN5 resulted down-regulated in MCF7 and up-regulated in PC3 and T24.

106 It is well known that photon radiation acts, at the molecular level, producing reactive oxygen species  
107 (ROS)<sup>8</sup>. In this regard, we found that cytoplasmatic ROS, measured by means of fluorogenic CM-  
108 H2DCFDA probe, were significantly upregulated in H4, H460, MCF7 and PC3, while no differences  
109 were detected in T24, after radiation (**Figure S1**). Moreover, H4, H460 and PC3 showed  
110 upregulated levels of SOD1, SOD2 and catalase, respectively. SOD2 mRNA was also upregulated  
111 in T24, despite the fact that general ROS levels resulted not altered 72 hrs after radiation treatment,  
112 while it was downregulated in radiation treated MCF7.

113 In order to deal with this ROS increase, cancer cells need to tune their ROS scavenging systems  
114<sup>16</sup>, and among all scavenging systems, LDs have been observed to contribute to the modulation of  
115 excessive oxidative stress<sup>17</sup>. Furthermore, by co-staining LDs and ROS in the heterogeneous not  
116 irradiated cancer populations, we found that populations with higher LDs also exhibited higher  
117 levels of ROS (**Figure S2**). Therefore, LD content, influencing cell survival, was directly correlated  
118 with ROS production in all cell lines.

119 Previous works reported that ionizing radiation could selectively enrich the cancer cell population  
120 of cells with stem-like properties<sup>18-20</sup>. Thus, we have analyzed the expression of some of the most  
121 common markers used to identify CSCs. In particular, we found that CD44 was upregulated in 6  
122 Gy treated H4, H460, MCF7 and T24; CD133 mRNA increased in H4 and H460-irradiated cells;  
123 CD166 expression was upregulated in MCF7 and T24; ALDH1 was incremented in MCF7. On the  
124 contrary, PC3 RR cells did not display significant increase in the expression of such CSC markers  
125 (**Figure S3**).

#### 126 **LD<sup>high</sup> sub-population retains the highest clonogenic potential**

127 LD modulation following X-ray treatment raised the question if LD accumulation was a  
128 consequence of radiation treatment or if such a feature was already present in some cells within  
129 the heterogeneous cancer populations, thus suggesting that LD content could participate in  
130 conferring a higher radiation resistance.

131 To better define the role played by LDs in RR cells and to address the question, H4, H460, MCF7,  
132 PC3 and T24 were stained with LD540, sorted in the 10% highest and lowest LD-containing cells  
133 (LD<sup>High</sup> and LD<sup>Low</sup> cells) (**Figure 2**) and, soon after, irradiated with 2, 4 and 6 Gy X-ray. The surviving  
134 fractions (SFs), calculated for all cell lines at the different doses, showed that LD<sup>High</sup> cells retained  
135 the highest clonogenic potential and therefore they were the most radioresistant (**Figure 2**). These  
136 results suggest that the LD amount present in the population is linked to a stronger cell capability  
137 to survive ionizing radiations, independently of the tissue of origin.

138

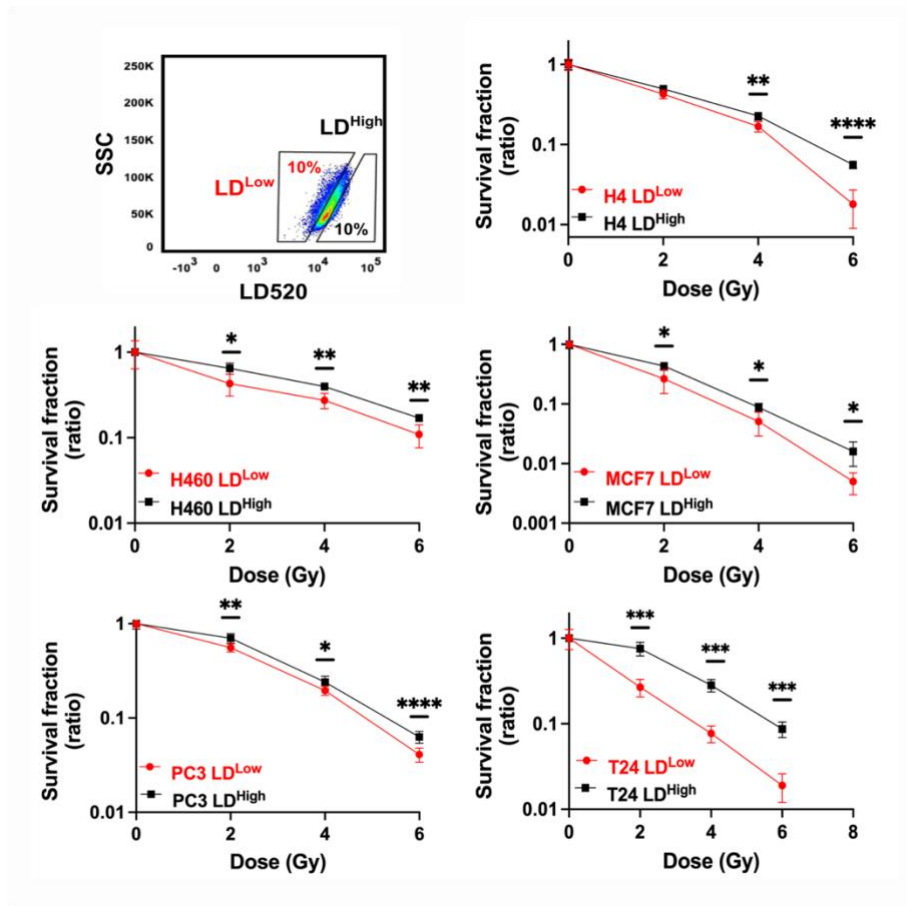

**Figure 2: Cell survival curves for H4, H460, MCF7, PC3 and T24 cancer cell lines.** All cancer cell lines were stained with LD540 and then sorted in the 10% highest and lowest LD-expressing cells (**box up-left**). For each cell line, the two LD sub-populations were irradiated at 0, 2, 4 and 6 Gy X-ray and their survival fraction calculated. Survival fractions are reported in log-linear scale. Error bar represents the means  $\pm$  SD from three independent experiments. \*  $\leq$  0.05; \*\*  $\leq$  0.01; \*\*\*  $\leq$  0.001 and \*\*\*\*  $\leq$  0.0001.

139

140 **Ferritin Heavy Chain (FTH1) affects LD accumulation and cell radio-response**

141 One of the main cellular ROS sources is the Fenton reaction, in which the  $\text{Fe}^{2+}$  reacts with hydrogen  
 142 peroxide ( $\text{H}_2\text{O}_2$ ) to produce  $\text{Fe}^{3+}$  and highly reactive radicals, such as the hydroxyl radical ( $\cdot\text{OH}$ ).  
 143 Since the Ferritin is the main intracellular iron storage protein, we investigated the FTH1 role in  
 144 radiation resistance.

145 We found that FTH1 protein was upregulated in all resistant cell lines after 72 hrs from 6 Gy  
 146 exposure, as reported in **Figure 3A**. Moreover, H460 and MCF7, sorted on the basis of their LD  
 147 content, were characterized by an increase in the mRNA level of FTH1 in the  $\text{LD}^{\text{high}}$  subpopulation  
 148 compared to the  $\text{LD}^{\text{low}}$  cells (**Figure 3B**).

149 To better clarify this link, FTH1 was silenced in H460 and MCF7 ( $\text{H460}^{\text{shFTH1}}$  and  $\text{MCF7}^{\text{shFTH1}}$ ), the  
 150 efficiency of which is shown in **Figure 3C**. FTH1 silencing resulted in influencing cell ability to deal  
 151 with free cytoplasmic iron, as demonstrated by the downregulation of Transferrin Receptor 1 (TfR1)  
 152 mRNA and the up-regulation of Ferroportin (FPN) mRNA, all involved in proper iron homeostasis  
 153 (**Figure S4 A and B**).

154 Interestingly, in FTH1 silenced H460 and MCF7, the amount of FTH1 directly correlated with the  
 155 number of LDs (**Figure 3D**). In fact,  $\text{H460}^{\text{shFTH1}}$  and  $\text{MCF7}^{\text{shFTH1}}$  cells were characterized by a



156 significant reduction of LDs. This, in turn, led to an evident increase in the radiosensitivity, as  
 157 demonstrated by the clonogenic assay results (**Figure 3E**).

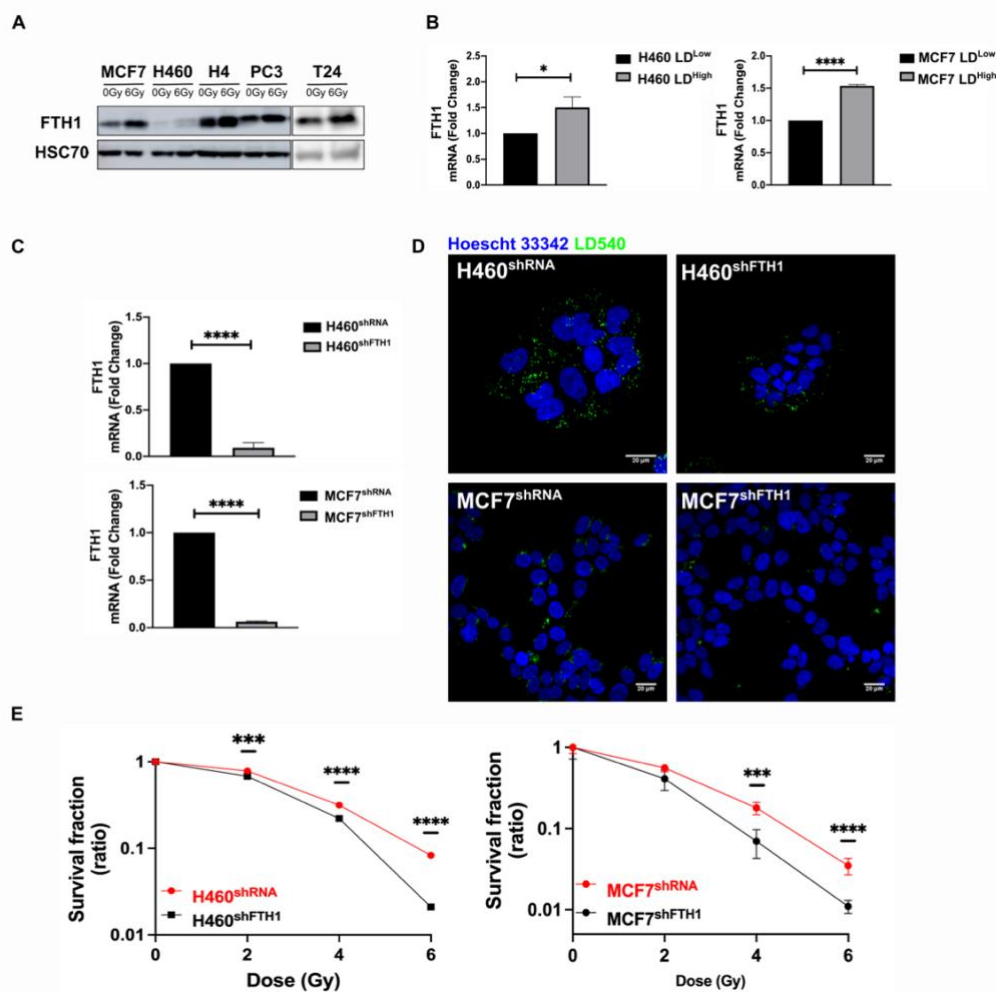

158  
 159

**Figure 3: FTH1 silencing downregulates Lipid Droplets affecting cancer radioresistance.** **A)** Western blotting analysis of FTH1 expression in MCF7-, H460-, H4-, PC3-, T24- 0Gy vs 6Gy X-ray treated cells. HSC70 was used as a loading control. **B)** H460 and MCF7 were sorted in the 10% Highest (H460 LD<sup>High</sup> and MCF7 LD<sup>High</sup>) and Lowest (H460 LD<sup>Low</sup> and MCF7 LD<sup>Low</sup>) LD-expressing cells and then FTH1 mRNA expression measured by qRT-PCR in all four sub-populations. Primer sequences are listed in the Supporting Information. **C)** H460 and MCF7 were silenced for FTH1 by lentiviral-driven shRNA strategy. PCR results showed that in H460 shFTH1 and MCF7 shFTH1 there was a clear FTH1 mRNA reduction compared with their relative controls. **D)** LD content was measured in H460 shFTH1 and MCF7 shFTH1 by confocal microscopy. LD540 staining revealed that the FTH1 gene silencing caused a LD decrease in both cell systems. (Scale bars 20  $\mu$ M). **E)** Cellular irradiation response in H460 and MCF7 silenced for FTH1 was investigated by radiobiological clonogenic assay and compared with H460 shRNA and MCF7 shRNA respectively. Survival fraction (in log-linear scale) is reported in the panel E. Error bar represents the means  $\pm$  SD from three independent experiments. \*  $\leq 0.05$ ; \*\*  $\leq 0.01$ ; \*\*\*  $\leq 0.001$  and \*\*\*\*  $\leq 0.0001$ .

160  
 161

162 Summarizing, we show that LD content was dependent on the FTH1 expression and thus linked to  
 163 the free cytoplasmic iron. When the levels of the main protein responsible for iron storage  
 164 decreased, LDs were also reduced and this significantly impaired cancer RR.

165 **Iron Imbalance as well as FTH1 reconstitution re-establish LD expression and radiation**  
 166 **resistance**

167 As well known, the FTH1 role is crucial for the iron storage within the cell and the maintenance of  
 168 the redox homeostasis. When its expression is downregulated, the  
 169 balance between the iron uptake and release is compromised. By consequence, the free cellular  
 170 iron amount becomes critical for the correct cellular functions<sup>10,21</sup>. Here we found that this iron

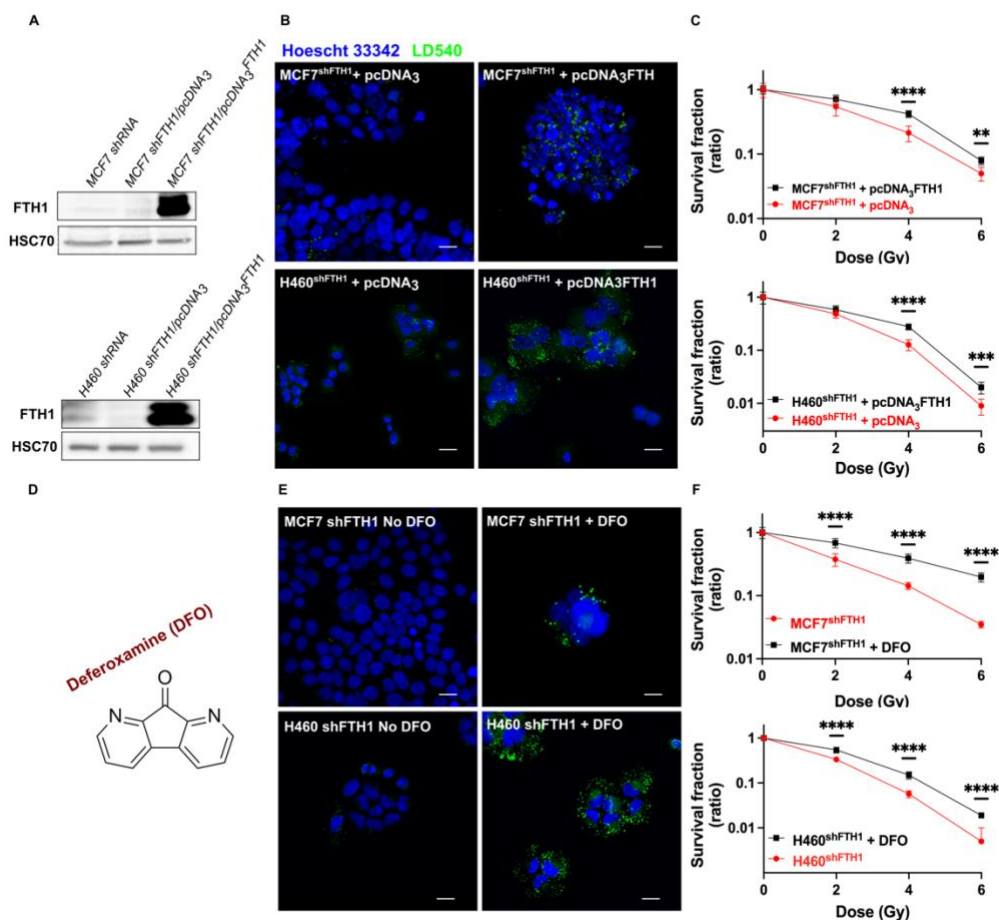

**Figure 4: FTH1 reconstitution as well as DFO treatment restore the LD content re-establishing cancer radioresistance. A)** Western Blotting analysis of FTH1 expression in MCF7 shFTH1/pcDNA<sub>3</sub>FTH1 and H460 shFTH1/pcDNA<sub>3</sub>FTH1. HSC70 was used as loading control. **B)** Z-stack representative confocal fluorescence images of LD detection in MCF7 shFTH1/pcDNA<sub>3</sub>FTH1 and H460 shFTH1/pcDNA<sub>3</sub>FTH1 cells and their H460 shFTH1/pcDNA<sub>3</sub> and MCF7 shFTH1/pcDNA<sub>3</sub> controls. (Scale bars 20 μM). **(C)** Survival fractions (in log-linear scale) after FTH1 reconstitution in MCF7- and H460- shFTH1 cells. The iron chelator agent Deferoxamine (DFO), whose chemical structure is reported in **D**, was used for treating MCF7 shFTH1 and H460 shFTH1 for 24 hrs. **(E)** In both cell lines, DFO treatment increased the LD numbers, as showed by confocal microscopy images (Scale bar 20 μM). **(F)** Survival curves (in log-linear scale) of FTH1-silenced MCF7 and H460 cells after DFO treatment. F. Error bar represents the means ± SD from three independent experiments. \* ≤ 0.05; \*\* ≤ 0.01; \*\*\* ≤ 0.001 and \*\*\*\* ≤ 0.0001.

171 imbalance assumed also a central role in the LD accumulation. Given the role played by the FTH1  
172 deficiency on LD content and radiosensitivity, we reconstituted the FTH1 expression by full length  
173 FTH1 cDNA transfection to further verify such connection. **Figure 4A** shows that FTH1 gene  
174 restoration successfully raised FTH1 protein expression up in both MCF7<sup>shFTH1</sup> + pcDNA<sub>3</sub>FTH1 and  
175 H460<sup>shFTH1</sup> + pcDNA<sub>3</sub>FTH1.

176 Moreover, such a reconstitution was sufficient to fully restore the LD pool (**Figure 4B**) and to  
177 reacquire a higher RR in both cell lines (**Figure 4C**).

178 To further elucidate the connection between iron and LDs, we used an iron chelator agent,  
179 Deferoxamine (DFO), to cope with the iron imbalance due to the FTH1 silencing. DFO is a high-  
180 affinity Fe<sup>3+</sup> chelator and an FDA approved drug used to treat patients with iron overload.  
181 H460<sup>shFTH1</sup> and MCF7<sup>shFTH1</sup> were treated with DFO for 24 hrs and their LD content was analyzed.  
182 LD540 staining on both treated H460<sup>shFTH1</sup> (H460 shFTH1 + DFO) and MCF7 shFTH1 (MCF7  
183 shFTH1 + DFO) univocally showed that the iron chelation was able to induce LD accumulation and  
184 this, in turn, conferred higher survival ability to cells after radiation treatment, as shown by  
185 clonogenic assays (**Figure 4F**).

186

## 187 Discussion

188 Along with surgery and chemotherapy, radiotherapy represents an important treatment option also  
189 in the palliative regimens. Great advance in the understanding of the molecular mechanisms  
190 underlying the cancer RR have been done. Nevertheless, this has not translated into a proportional  
191 improvement of the therapeutic outcomes because multiple biological factors and their complex  
192 interactions capable of negatively affecting the cellular response to ionizing radiation remain to be  
193 characterized. Radioresistance exhibited by many cancer cells, especially CSCs, severely limits  
194 the effectiveness of the treatments. For this reason, the identification of specific features for  
195 targeting RR cells is critical, and it is currently the focus of intense research. Classical CSC markers  
196 used to identify the most putative RR cells are still being debated due the high intra- and inter-  
197 tumor heterogeneity<sup>22</sup> and the cancer cell ability to change during cancer progression and  
198 treatments. In recent years, accumulating studies suggested that LDs might be correlated with a  
199 CSC phenotype and an elevated tumorigenic potential<sup>4</sup>. Increased LD amount has been found in  
200 various cancer cells with stem-like properties, including colorectal cancer cells<sup>4</sup>, glioblastoma cells  
201<sup>7</sup> and breast cancer cells<sup>6</sup>.

202 In the present study, lung (H460), neuroglioma (H4), breast (MCF7), prostate (PC3) and bladder  
203 (T24) cancer cells were irradiated with 6 Gy X-rays and left in culture for 3 days in order to select  
204 only the RR cells. Surviving cells from all cell lines exhibited an elevated LD content, to which  
205 corresponded a cell type-dependent upregulation of the PLIN genes, whose proteins play a role in  
206 the formation and structure of LDs. These RR cells also showed differential and cell-specific  
207 upregulation of some CSC markers in almost all cell lines. Although we did not screen all the  
208 putative stemness markers, our preliminary data indicates that radiation exposure might enrich the  
209 heterogeneous population with cells having a stemness-like phenotype, which is in agreement with  
210 previous works<sup>18,20</sup>.

211 Meanwhile, RR cells with high LD content showed higher ROS levels associated with an increased  
212 antioxidant ability, as demonstrated by the genetic upregulation of antioxidant scavenging  
213 enzymes, such as SOD and Catalase. However, this behavior was not common to all cell lines,  
214 and, in fact, in T24 ROS levels remained unchanged. This suggest that cells from different origin  
215 were able to deal with the high dose radiation in different ways, but they all shared the ability to  
216 accumulate cytoplasmic LDs. Of note, the presence of cells with high levels of ROS in the not-  
217 irradiated cells also displaying high levels of LDs suggest that LDs could serve an antioxidant  
218 system being able to buffer the excess of ROS. Indeed, high ROS levels are commonly found in  
219 many cancer cells and LDs could contribute to create a tolerable oxidative microenvironment and  
220 to better counteract the excess of ROS produced by irradiation.

221 In support of that, we demonstrated that a higher LD content was a feature already present in the  
222 heterogeneous populations, as pre-sorted (LD<sup>high</sup> and LD<sup>low</sup>) cells displayed differential survival  
223 capacity after radiation, with the LD<sup>high</sup> subpopulation displaying the highest clonogenic response.  
224 This indicates that the presence of a higher LD amount was an intrinsic feature of the cells and



225 may represent a selective advantage which might allow resistant cells to survive damages,  
226 including oxidative stress induced by ROS production following exposure to ionizing radiation.  
227 Many intracellular mechanisms participate in ROS production and the Fenton reaction is one of  
228 them. In this reaction, ferrous ion is used as a catalyst to convert H<sub>2</sub>O<sub>2</sub> into the highly oxidative  
229 hydroxyl radical (OH•). Iron is an important player in normal cells because it is involved in many  
230 processes and therefore its homeostasis is tightly regulated. However, in cancer cells iron  
231 homeostasis is dysregulated and Ferritin, the protein involved in iron storage, has been shown to  
232 be elevated in some tumor tissues, thus suggesting that increased iron storage in cancer cells  
233 might contribute to cell survival <sup>11</sup>.  
234 Previous studies showed a crucial role for FTH1 in cancer aggressiveness. In FTH1-silenced MCF7  
235 and H460, cells acquired a mesenchymal phenotype associated with an epithelial to mesenchymal  
236 transition and the activation of the CXCR4/CXCL12 signaling pathway <sup>12</sup>. However, studies on  
237 Ferritin and iron roles in radiotherapy are limited. Naz and colleagues demonstrated an  
238 upregulation of hepatic ferritin and elevated FTL serum levels in sham-irradiated rats <sup>10</sup>.  
239 In this work, we investigated the effects of X-ray radiation on RR cancer cells in order to determine  
240 a possible relationship between FTH1 and LDs. We found that surviving cells in all lines showed  
241 an upregulation, although at different extents, of FTH1 protein. Moreover, in both MCF7- and H460-  
242 LD<sup>High</sup> fractions, FTH1 resulted upregulated as compared to the MCF7- and H460-LD<sup>Low</sup>  
243 counterparts. The link between FTH1 and LDs was further confirmed by the reduction of LD  
244 accumulation in FTH1-silenced cells. Moreover, FTH1 downregulation associated with the  
245 downregulation of transferrin receptor that mediates extracellular iron uptake and the upregulation  
246 of ferroportin, responsible for iron release, indicating that most likely iron levels in FTH1-silenced  
247 cells were unbalanced. In such conditions, cells were significantly more sensitive to ionizing  
248 radiation than the relative controls. These findings show a strong correlation between FTH1  
249 expression and LD content in radioresistant cells and, indirectly, suggest that unbalanced  
250 intracellular availability of iron produced effects on lipid pathways, mainly on LD accumulation.  
251 These data were then corroborated by restoration of FTH1 expression in silenced H460 and MCF7  
252 cell lines, where we observed a restored LD content together with an increased clonogenic  
253 response. Our findings support the idea that the two cell states (LD<sup>High</sup>/FTH1<sup>High</sup> and LD<sup>Low</sup>/FTH1<sup>Low</sup>)  
254 are not irreversible processes, but they are reversible mechanisms where the big player is the  
255 cytoplasmic iron pool. Alteration in FTH1 expression induce alterations of intracellular free Fe  
256 levels. Excess iron is cytotoxic, mainly because of the production of ROS, and in our study cells  
257 with reduced ability to store iron also showed reduced RR. However, in absence of adequate levels  
258 of FTH1, treatment with an iron chelator was able to reduce the excess iron inside cells and this  
259 caused a significant LD re-accumulation in both FTH1-silenced (MCF7 and H460) cell lines. Once  
260 again, re-established LD content and iron storage resulted in increased RR of both cell lines.  
261 Therefore, iron homeostasis is strongly correlated to the surviving ability of the RR cells and LDs  
262 are important mediators in these processes.  
263 Although the data reported here need to be validated in more physiologically complex systems,  
264 they provide novel insights about LD involvement in the radio-resistance of cancer cells and show  
265 that this feature is common to different tumor cells analyzed in the present study. Further, our data  
266 describe the dynamic interplay between LDs and iron homeostasis, showing that it plays a crucial  
267 role in the context of tumor RR. These functional cross-talks need to be more deeply explored in  
268 order to determine the potential contribution of other related pathways and organelles in these  
269 processes. This would offer the opportunity for a better understanding of the mechanisms behind  
270 radiation responses and may suggest novel strategies for incrementing the radiotherapy curative  
271 capacity.  
272 Lastly, a common effort has to be put forth in the identification of robust and functional predictive  
273 biomarkers to be used to target the most resistant cancer populations by precise treatments, which  
274 need to be as specific as possible for the most tumorigenic cells (CSCs/CICs) while preserving, as  
275 much as possible, toxicity on the healthy cell population <sup>19</sup>.  
276  
277  
278

## 279 **Materials and Methods**

280

### 281 **Cell Cultures and Transfection**

282 MCF-7 human breast adenocarcinoma and H4 neuroglioma cell lines (ATCC) were cultured in  
283 DMEM medium (Thermo Fischer Scientific) supplemented with Fetal Bovine Serum (FBS) 10%  
284 (Thermo Fischer Scientific), Pen/Strep 1% (Thermo Fischer Scientific). H460 human non-small lung  
285 cancer cells (ATCC) were cultured in RPMI 1640 (Thermo Fischer Scientific) medium  
286 supplemented with 10% FBS and 1% Penicillin-Streptomycin (Thermo Fischer Scientific). T24  
287 bladder carcinoma cell line (ATCC) was cultured in McCoy's medium (Thermo Fischer Scientific)  
288 supplemented with FBS 10% (Thermo Fischer Scientific), Pen/Strep 1% (Thermo Fischer  
289 Scientific) and Hepes 1% (Thermo Fischer Scientific). PC3 prostate adenocarcinoma cells (ATCC)  
290 were cultured in F-12K medium (Thermo Fischer Scientific), supplemented with FBS 10% (Thermo  
291 Fischer Scientific), Pen/Strep 1% (Thermo Fischer Scientific). All these cell lines were maintained  
292 at 37°C in a humidified 5% CO<sub>2</sub> atmosphere and cultured following ATCC recommendations.

293 Lentiviral transduced MCF7 and H460 were kindly provided by the laboratory headed by Prof.  
294 Francesco Saverio Costanzo at the University Magna Graecia of Catanzaro. Both cell lines were  
295 stably transduced with a lentiviral DNA containing either an shRNA that targets the 196–210 region  
296 of the FTH1 mRNA (sh29432) (MCF-7shFTH1, H460shFTH1) or a control shRNA without  
297 significant homology to known human mRNAs (MCF-7shRNA, H460shRNA). MCF-7shRNA and  
298 MCF-7shFTH1 were cultured in DMEM medium (Thermo Fischer Scientific) supplemented with  
299 FBS 10% (Thermo Fischer Scientific), Pen/Strep 1% (Thermo Fischer Scientific), puromycin 1µg/ml  
300 (Sigma-Aldrich). H460shRNA and H460shFTH1 were cultured in RPMI 1640 (Thermo Fischer  
301 Scientific) medium supplemented with 10% FBS and 1% Penicillin-Streptomycin (Thermo Fischer  
302 Scientific), puromycin 1µg/ml; All cell lines were maintained at 37°C in a humidified 5% CO<sub>2</sub>  
303 atmosphere.

### 304 **Radiation Treatment and Clonogenic Assay**

305 Irradiation has been carried out using a Multi Rad 225kV irradiator. Cells, seeded at a density of  
306  $3.5 \times 10^5$  and  $1.0 \times 10^6$  cells for 0 and 6 Gy respectively, were irradiated with 6 Gy at room  
307 temperature and left in culture for 72 hours in order to get only surviving cells at the end of the  
308 culturing time. Fresh medium was replaced every day.

309 Cell survival was evaluated using a standard colony forming assay. H4 LD<sup>High</sup> and LD<sup>Low</sup>, H460  
310 LD<sup>High</sup> and LD<sup>Low</sup>, MCF7 LD<sup>High</sup> and LD<sup>Low</sup>, PC3 LD<sup>High</sup> and LD<sup>Low</sup>, T24 LD<sup>High</sup> and LD<sup>Low</sup>, H460  
311 shRNA, H460 shFTH1, H460 shFTH1 + DFO, H460 shFTH1/pcDNA<sub>3</sub>, H460  
312 shFTH1/pcDNA<sub>3</sub>FTH1, MCF7 shRNA, MCF7 shFTH1, MCF7 shFTH1 + DFO, MCF7  
313 shFTH1/pcDNA<sub>3</sub> and MCF7 shFTH1/pcDNA<sub>3</sub>FTH1 populations were collected soon after sorting.  
314 Cells were seeded into six well plates (Corning) at a density of  $2 \times 10^2$  -  $1 \times 10^4$  cells/well, irradiated  
315 (2, 4 and 6 Gy single dose) with a Multi Rad 225kV irradiator and incubated for 7 -12 days at 37°C  
316 in a humidified atmosphere with 5% CO<sub>2</sub>. Following incubation, colonies were fixed in 100% ethanol  
317 and stained using a 0.05% crystal violet solution. Only the colonies with more than 35 cells were  
318 counted. Surviving fractions were calculated after correction for plating efficiency of control cells.  
319 At least three independent experiments, each in duplicate, have been performed for the above-  
320 mentioned cell samples.

### 321 **Cell Sorting**

322 T24, MCF-7, H460, H4, PC3 cell suspensions were washed in Phosphate-Buffered Saline (PBS)  
323 (Thermo Fischer Scientific). Cells were then stained with LD540 for 10 min at 37°C in the incubator.  
324 The excess of dye was washed away with PBS and cells were resuspended in sorting buffer (PBS  
325 Ca/Mg-free, BSA 0,5%, EDTA 2 mM and Hepes 15mM).

326 Cells were sorted in two populations (LD<sup>High</sup> and LD<sup>Low</sup>) using a FACSaria Fusion (BD Bioscience).  
327 Sorting gates were established based on the 10% most bright and 10% most dim subpopulation.  
328 All cell sorting experiments have been carried out within 1 hour upon sorting to avoid that sorted  
329 cells could start becoming heterogeneous again.

### 330 **Lipid Droplet Staining**

331 Depending on the project needs, LD content was assessed by staining cells with two different dyes:  
332 LD540 and Nile Red. For FACS measurements,  $4 \times 10^5$  cells have been harvested, washed with  
333 PBS and then stained with  $0.1 \mu\text{g/ml}$  LD540 or 1/500 (from a saturated stock solution in acetone)  
334 Nile Red. Stained cells were analyzed at the FACS Canto II (BD Bioscience). Instead, for the  
335 confocal microscopy analysis,  $4 \times 10^3$  cells have been cultured on a 35mm Glass Bottom Dishes  
336 (MatTek Life Science) and then, fixed with PFA 4%. After washing out the PFA, fixed cells were  
337 stained with  $0.1 \mu\text{g/ml}$  LD540 and  $1 \mu\text{g/ml}$  Hoechst 33342 (Thermo Fischer Scientific). Cells were  
338 imaged by a Leica SP5 or a Zeiss LSM710 confocal microscope systems.

### 339 **ROS Staining**

340 Intracellular ROS content was measured by freshly prepared chloromethyl  
341 dichlorodihydrofluorescein diacetate (CM-H<sub>2</sub>DCFDA, Thermo Fisher Scientific) dye resuspended  
342 in anhydrous dimethyl sulfoxide (Thermo Fisher Scientific). Briefly,  $4 \times 10^5$  cells were collected and  
343 washed three times with PBS Ca<sup>+</sup>/Mg<sup>+</sup>-free 1X and soon after incubated with  $3.5 \mu\text{M}$  CM-H<sub>2</sub>DCFDA  
344 in pre-warmed Hank's balanced salt solution (HBSS, Thermo Fischer Scientific) for 20 min at 37°C,  
345 in the dark. The samples were analyzed, after having washed them with PBS, by using a  
346 FACSCanto II flow cytometer (BD Biosciences).

### 347 **Lipid Droplet and ROS co-staining**

348  $4 \times 10^5$  cells were harvested, washed with PBS 1X and soon after stained with 1/500 (from a  
349 saturated stock solution in acetone) of Nile Red for 20 min at 37°C in the dark. Stained cells were  
350 washed three times and then incubated with  $3.5 \mu\text{M}$  of CM-H<sub>2</sub>DCFDA in HBSS for 20 min at 37°C  
351 in the dark. After one wash in PBS 1X, cells were analyzed using a FACS Canto II (BD Bioscience).

### 352 **Antibodies and Western Blot Analysis**

353 H4 0 and 6 Gy, H460 0 and 6 Gy, MCF7 0 and 6 Gy, PC3 0 and 6 Gy, T24 0 and 6 Gy, MCF7  
354 shRNA, MCF7 shFTH1/pcDNA<sub>3</sub>, MCF7 shFTH1/pcDNA<sub>3</sub>FTH1, H460 shRNA, H460  
355 shFTH1/pcDNA<sub>3</sub> and H460 shFTH1/pcDNA<sub>3</sub>FTH1 cells were washed twice with cold PBS and  
356 incubated for 20 min with 300  $\mu\text{L}$  of 1X Ripa Buffer (Cell Signaling) additioned with Halt<sup>TM</sup> Protease  
357 Inhibitor Single-Use Cocktail, (Thermo Fisher Scientific) and Halt<sup>TM</sup> Phosphatase Inhibitor Single-  
358 Use Cocktail (Thermo Fisher Scientific), both diluted 1:100. Cells were then transferred to tubes  
359 and, after centrifugation at 14000xg at 4°C for 20 minutes, the supernatants were collected. Protein  
360 concentration was measured by BCA Protein assay kit (Thermo Fisher Scientific) at 562 nm using  
361 BSA to produce a standard curve. For protein analysis, 15  $\mu\text{g}$  of whole cell extracts for each sample  
362 were electrophoresed under reducing condition in 10% SDS-polyacrylamide gels and then  
363 electrophoretically transferred onto PVDF membrane filters (Bio-Rad Laboratories), using Trans-  
364 Blot Turbo Transfer System (Bio-Rad Laboratories, Hercules, CA, USA). In order to prevent the  
365 non-specific antibody binding, blots were blocked for 1 hr with BSA blocking buffer, 5% in PBS,  
366 with 0,1% Tween-20 (TWEEN 20 Bio-Rad Laboratories). Membranes were washed with PBS-0.1%  
367 Tween and incubated with antibodies in blocking solution overnight at 4 °C. Antibody used was a  
368 rabbit anti H- ferritin (1:200; Santa Cruz Biotechnology, Texas, USA). PBS-0.1%Tween-20 was  
369 used to remove the excess of primary antibody and then the membranes were incubated in blocking  
370 solution with goat anti-mouse IgG-HRP (1:2000, Santa Cruz Biotechnology) secondary antibody.  
371 Subsequently, blots were rinsed with 0.1% PBS-Tween and developed with Clarity Western ECL  
372 Substrate (Bio-Rad Laboratories) using Amersham Imager 680. Protein levels were analyzed by  
373 ImageJ 1.52p software.

### 374 **RNA isolation and Real-Time PCR (qRT-PCR)**

375 Total RNA was isolated from 6 Gy irradiated and non-irradiated cells, LD<sup>High</sup> and LD<sup>Low</sup> sorted cells,  
376 MCF-7 shRNA and MCF-7 shFTH1 as well as H460 shRNA and H460 shFTH1 using the High Pure  
377 RNA isolation kit (Roche) according to the manufacturer's instructions. All the RNA samples were  
378 treated with DNase-1 to remove any contaminating genomic DNA and the RNA purity was checked

379 spectroscopically. Then, 1  $\mu\text{g}$  of purified RNA was reverse transcribed using RT<sup>2</sup> First Strand Kit  
380 (Qiagen) according to the manufacturer's instructions.

381 Gene expression analysis was assessed by Real-Time PCR (qRT-PCR) using the cDNA obtained  
382 from the cell samples above reported.

383 20 ng of cDNA was amplified in 15  $\mu\text{l}$  of reaction mix containing Power SYBR Green PCR Master  
384 mix (ThermoFisher Scientific), 20 pmol of each primer pair and nuclease-free water on a StepOne  
385 Plus System (ThermoFisher scientific). The thermal profile consisted of 1 cycle at 95 °C for 10 min  
386 followed by 40 cycles at 95°C for 15 sec, 60°C for 1 min. Relative gene expression was normalized  
387 to that of the gene encoding the human GAPDH which served as an internal control. Data analysis  
388 was performed using the 2- $\Delta\Delta\text{Ct}$  method.

389

### 390 **Widefield and Confocal Microscopy**

391 T24, H4, PC3, MCF7, MCF7 shRNA, MCF7 shFTH1, H460, H460 shRNA and H460 shFTH1 were  
392 seeded and stained with LD540 as reported in the Lipid Droplet Staining section. Zeiss LSM710  
393 and Leica SP5 microscopes, both equipped with a 40X and 63X, were used to image LDs.

### 394 **Image Analysis**

395 Z-stack images of LD540 stained cells were taken using a Leica SP5 confocal-laser-scanning  
396 microscope equipped with a 40x oil immersion i-Plan Apochromat (numerical aperture 1.40)  
397 objective. LD540 were visualized using the 488 nm line of an Argon laser and a 505-530 nm BP  
398 filter. 12-bit images were acquired and post processed for the LD quantification. Briefly, the  
399 background was subtracted using ImageJ's Rolling ball radius tool. The images were further  
400 processed with Gaussian filter, thresholded and segmented with Find Maxima tool. Finally, images  
401 were analyzed with Analyze Particles tools. All the image processing was performed automatically  
402 with constant settings using in house developed macro for Fiji generously provided by Dr. Damir  
403 Kronic.

404 Student's t-test with unequal variances was used for the calculation of statistical significances.  
405 Differences of two groups with P values below 0.05 were considered statistically significant.

### 406 **FTH1 Reconstitution**

407 MCF7 shFTH1 and H460 shFTH1 cells were seeded in six-well plates at  $3 \times 10^5$  cells/well and  
408 grown overnight prior to transfection.

409 All plasmids were transfected with Lipofectamine 3000 transfection reagent (Thermo Fisher  
410 Scientific) following manufacturer's instructions. FTH1 reconstitution was performed using 2,5  $\mu\text{g}/\mu\text{l}$   
411 of the expression vector containing the full length of human FTH1 cDNA (pcDNA3/FTH1) (MCF-7  
412 shFTH1/pcDNA<sub>3</sub>FTH1 and H460 shFTH1/pcDNA<sub>3</sub>FTH1) while 2,5  $\mu\text{g}/\mu\text{l}$  of pcDNA<sub>3</sub> plasmid was  
413 used as negative control (MCF-7 shFTH1/pcDNA<sub>3</sub> and H460 shFTH1/pcDNA<sub>3</sub>). Transfection  
414 efficiency was tested by western blot and qPCR after 48 hrs. All transfection experiments were  
415 repeated in triplicate.

### 416 **Deferoxamine Treatment**

417 MCF-7-Wt, MCF-7-shRNA, MCF-7-shFTH1, H460-Wt, H460-shRNA and H460-shFTH1 cells were  
418 seeded in 100 mm<sup>2</sup> petri dishes (Corning) at a concentration of  $1,5 \times 10^6$  cells/plate containing 10  
419 mL of DMEM or RPMI-1640 (supplemented with 10% FBS) and incubated for 24 hrs. Then, cells  
420 were treated with 50  $\mu\text{M}$  DFO (Deferoxaminemesylate salt). Cells cultured in normal medium were  
421 used as control. After 24 hrs of treatment, cells were collected and used for ROS and LD detection.

### 422 **Statistics**

423 All data here presented are shown as mean values  $\pm$  SD of the irradiated or "treated" samples  
424 relative to the untreated control. Statistical and data analysis was carried out using GraphPad Prism  
425 9 software. Statistical differences between treated and untreated samples were assessed by T-  
426 Test and one-way ANOVA. The threshold for statistical significance was set to P = 0.05.

427

428



## 429 **Acknowledgments**

430 We gratefully acknowledge the Imaging and FACS facilities of the DKFZ for their precious support.  
431 LT has received funding from AIRC and from the European Union's Horizon 2020 Research and  
432 Innovation Programme under the Marie Skłodowska-Curie grant agreement No 800924.

## 433 **Author Contributions**

434 L.T. and J.S. designed and coordinated the whole project; L.T., M.G.M., F.P. and J.S. designed the  
435 experiments; L.T., M.G.M., J.J., I.A., R.H., and C.N. performed and analyzed all clonogenic assays  
436 M.G.M., I.A. and F.S.C. performed and supervised the FTH1 silencing as well as the FTH1  
437 reconstitution; L.T., F.P., J.F.G. and D.G.C. carried out the confocal analyses; M.G.M. and I.A.  
438 performed the DFO treatment; L.T., M.G.M., F.P., D.G.C. and J.J. performed the data analysis;  
439 L.T., M.G.M and F.P. wrote the manuscript; L.T., F.P., F.S.C. and J.S. revised the manuscript.

440

441

## 442 **References**

- 443 1 Baumann, M., Krause, M. & Hill, R. Exploring the role of cancer stem cells in  
444 radioresistance. *Nat Rev Cancer* **8**, 545-554, doi:10.1038/nrc2419 (2008).
- 445 2 Cruz, A. L. S., Barreto, E. D., Fazolini, N. P. B., Viola, J. P. B. & Bozza, P. T. Lipid droplets:  
446 platforms with multiple functions in cancer hallmarks. *Cell Death Dis* **11**, doi:ARTN  
447 10510.1038/s41419-020-2297-3 (2020).
- 448 3 Tirinato, L. *et al.* An Overview of Lipid Droplets in Cancer and Cancer Stem Cells. *Stem*  
449 *Cells Int* **2017**, doi:Artn 165605310.1155/2017/1656053 (2017).
- 450 4 Tirinato, L. *et al.* Lipid Droplets: A New Player in Colorectal Cancer Stem Cells Unveiled  
451 by Spectroscopic Imaging. *Stem Cells* **33**, 35-44, doi:10.1002/stem.1837 (2015).
- 452 5 Li, J. J. *et al.* Lipid Desaturation Is a Metabolic Marker and Therapeutic Target of Ovarian  
453 Cancer Stem Cells. *Cell Stem Cell* **20**, 303-+, doi:10.1016/j.stem.2016.11.004 (2017).
- 454 6 Havas, K. M. *et al.* Metabolic shifts in residual breast cancer drive tumor recurrence. *J Clin*  
455 *Invest* **127**, 2091-2105, doi:10.1172/Jci89914 (2017).
- 456 7 Kant, S. *et al.* Enhanced fatty acid oxidation provides glioblastoma cells metabolic plasticity  
457 to accommodate to its dynamic nutrient microenvironment. *Cell Death Dis* **11**, doi:ARTN  
458 25310.1038/s41419-020-2449-5 (2020).
- 459 8 Schonberg, D. L. *et al.* Preferential Iron Trafficking Characterizes Glioblastoma Stem-like  
460 Cells. *Cancer Cell* **28**, 441-455, doi:10.1016/j.ccell.2015.09.002 (2015).
- 461 9 Torti, S. V. & Torti, F. M. Iron and cancer: more ore to be mined. *Nat Rev Cancer* **13**, 342-  
462 355, doi:10.1038/nrc3495 (2013).
- 463 10 Wang, W., Knovich, M. A., Coffman, L. G., Torti, F. M. & Torti, S. V. Serum ferritin: Past,  
464 present and future. *Bba-Gen Subjects* **1800**, 760-769, doi:10.1016/j.bbagen.2010.03.011  
465 (2010).
- 466 11 Bystrom, L. M., Guzman, M. L. & Rivella, S. Iron and Reactive Oxygen Species: Friends  
467 or Foes of Cancer Cells? *Antioxid Redox Sign* **20**, 1917-1924, doi:10.1089/ars.2012.5014  
468 (2014).
- 469 12 Aversa, I. *et al.* Epithelial-to-mesenchymal transition in FHC-silenced cells: the role of  
470 CXCR4/CXCL12 axis. *J Exp Clin Canc Res* **36**, doi:ARTN 10410.1186/s13046-017-0571-  
471 8 (2017).
- 472 13 Lee, S., Jeon, H. & Shim, B. Prognostic Value of Ferritin-to-Hemoglobin Ratio in Patients  
473 with Advanced Non-Small-Cell Lung Cancer. *J Cancer* **10**, 1717-1725,  
474 doi:10.7150/jca.26853 (2019).
- 475 14 De Bortoli, M. *et al.* Lipid accumulation in human breast cancer cells injured by iron  
476 depletors. *J Exp Clin Canc Res* **37**, doi:ARTN 7510.1186/s13046-018-0737-z (2018).
- 477 15 Kimmel, A. R. & Sztalryd, C. The Perilipins: Major Cytosolic Lipid Droplet-Associated  
478 Proteins and Their Roles in Cellular Lipid Storage, Mobilization, and Systemic  
479 Homeostasis. *Annu Rev Nutr* **36**, 471-509, doi:10.1146/annurev-nutr-071813-105410  
480 (2016).



- 481 16 Trachootham, D., Alexandre, J. & Huang, P. Targeting cancer cells by ROS-mediated  
482 mechanisms: a radical therapeutic approach? *Nat Rev Drug Discov* **8**, 579-591,  
483 doi:10.1038/nrd2803 (2009).
- 484 17 Welte, M. A. Expanding Roles for Lipid Droplets. *Curr Biol* **25**, R470-R481,  
485 doi:10.1016/j.cub.2015.04.004 (2015).
- 486 18 Ghisolfi, L., Keates, A. C., Hu, X. W., Lee, D. K. & Li, C. J. Ionizing Radiation Induces  
487 Stemness in Cancer Cells. *Plos One* **7**, doi:ARTN e4362810.1371/journal.pone.0043628  
488 (2012).
- 489 19 Krause, M., Dubrovskaya, A., Linge, A. & Baumann, M. Cancer stem cells: Radioresistance,  
490 prediction of radiotherapy outcome and specific targets for combined treatments. *Adv Drug*  
491 *Deliver Rev* **109**, 63-73, doi:10.1016/j.addr.2016.02.002 (2017).
- 492 20 Woodward, W. A. *et al.* WNT/beta-catenin mediates radiation resistance of mouse  
493 mammary progenitor cells (vol 104, pg 618, 2007). *P Natl Acad Sci USA* **104**, 7307-7307,  
494 doi:10.1073/pnas.0702664104 (2007).
- 495 21 Rouault, T. A. The role of iron regulatory proteins in mammalian iron homeostasis and  
496 disease. *Nat Chem Biol* **2**, 406-414, doi:10.1038/nchembio807 (2006).
- 497 22 Shackleton, M., Quintana, E., Fearon, E. R. & Morrison, S. J. Heterogeneity in Cancer:  
498 Cancer Stem Cells versus Clonal Evolution. *Cell* **138**, 822-829,  
499 doi:10.1016/j.cell.2009.08.017 (2009).
- 500

## Supplementary Information for

### Lipid Droplets and Ferritin: a Devilish Liaison in Cancer Radioresistance

L. Tirinato<sup>a, b, 1, 2</sup>, M.G. Marafioti<sup>a, b, 1</sup>, F. Pagliari<sup>a, 1, 2</sup>, J. Jansen<sup>a, c</sup>, I. Aversa<sup>a, b</sup>, R. Hanley<sup>a</sup>, C. Nisticò<sup>a, b</sup>, D. Garcia-Calderón<sup>a, c</sup>, G. Genard<sup>a</sup>, J. F. Guerreiro<sup>d</sup>, F.S. Costanzo<sup>b</sup>, and J. Seco<sup>a, c, 2</sup>

<sup>a</sup> Biomedical Physics in Radiation Oncology, German Cancer Research Center (DKFZ), Im Neuenheimer Feld 223, 69120 Heidelberg, Germany.

<sup>b</sup> Experimental and Clinical Medicine Department, University Magna Graecia of Catanzaro, 88100 Catanzaro, Italy.

<sup>c</sup> Department of Physics and Astronomy, Heidelberg University, Im Neuenheimer Feld 227, 69120 Heidelberg, Germany.

<sup>d</sup> Centro de Ciências e Tecnologias Nucleares, Instituto Superior Técnico, Universidade de Lisboa, 2695-066 Bobadela LRS, Portugal

<sup>1</sup> L.T., M.G.M and F.P. contributed equally to this work.

<sup>2</sup> To whom correspondence may be addressed. Email: [j.seco@dkfz.de](mailto:j.seco@dkfz.de), [tirinato@unicz.it](mailto:tirinato@unicz.it), [f.pagliari@dkfz.de](mailto:f.pagliari@dkfz.de).

**L.T.:** 0000-0001-9826-2129; **M.G.M.:** 0000-0002-9469-2110; **F.P.:** 0000-0002-5547-222X; **J.J.:** 0000-0002-8625-3978; **I.A.:** 0000-0003-4721-6792; **R.H.:** 0000-0002-2627-1146; **C.N.:** 0000-0002-0787-9527; **J.G.:** 0000-0003-1960-603X; **J.S.:** 0000-0002-9458-2202.

#### This PDF file includes:

Figure S1 to S4  
Table S1

Fig. S1.

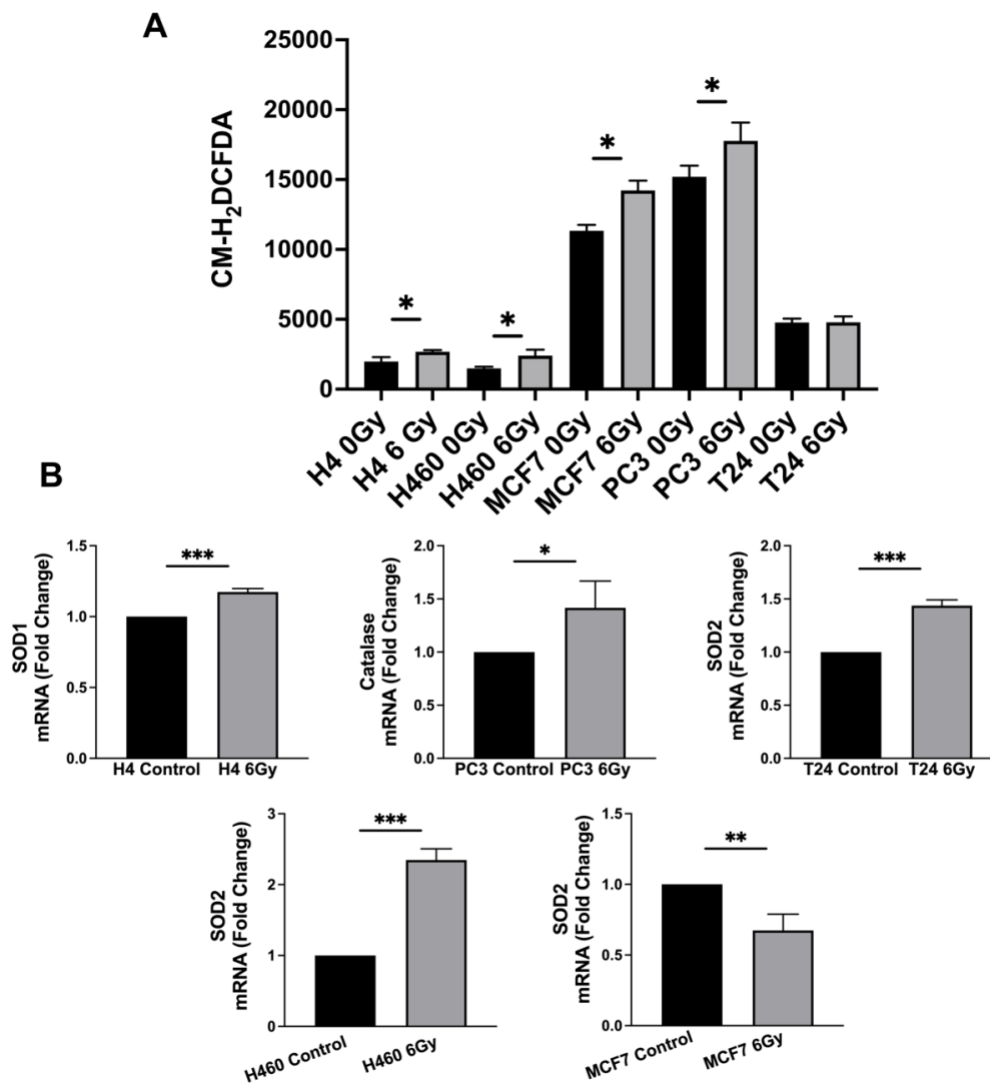

**Figure S1: ROS evaluation in 6 Gy radioresistant cancer cells.** **A)** ROS staining by CM-H<sub>2</sub>DCFDA probe was performed in 6 Gy treated and untreated H4, H460, MCF7, PC3 and T24 cancer cell lines. **B)** Gene expression analysis of genes related to oxidative stress responses by RT-qPCR. SOD1, SOD2, Catalase and GPX have been evaluated and only the significant genes are here reported. All data represent the means  $\pm$  SD from three independent experiments. \*  $\leq$  0.05; \*\*  $\leq$  0.01; \*\*\*  $\leq$  0.001 and \*\*\*\*  $\leq$  0.0001.

Fig. S2.

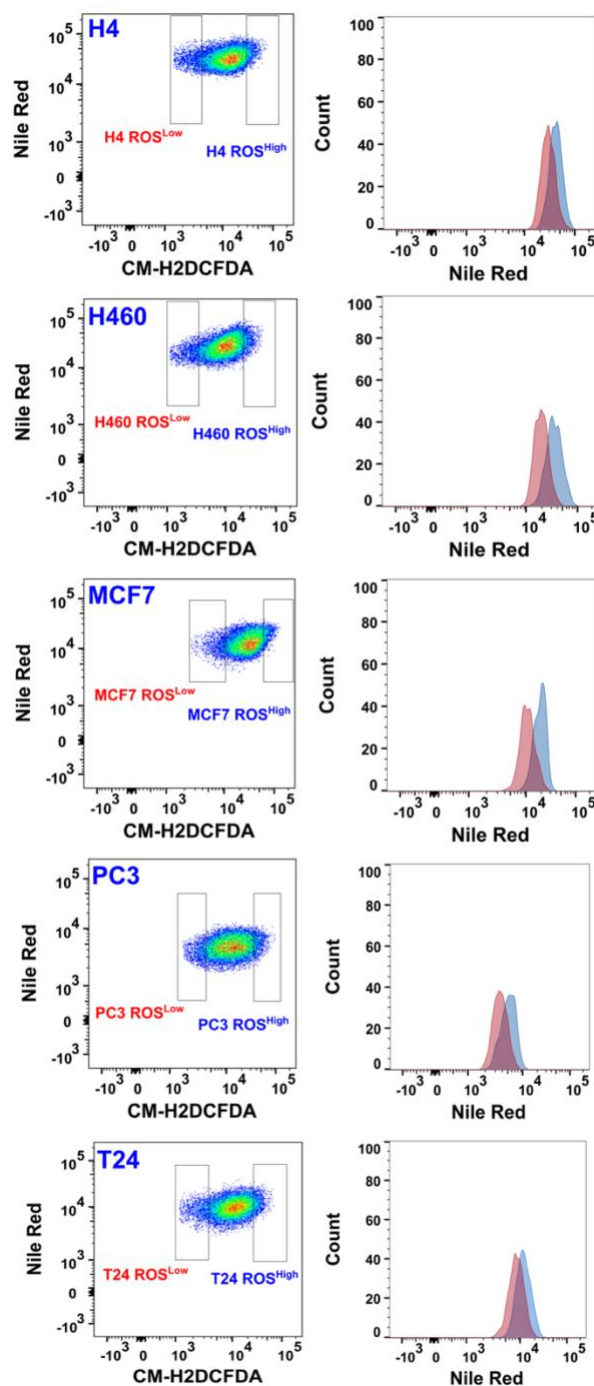

**Figure S2: ROS and Lipid Droplet Double Staining.** Heterogeneous H4, H460, MCF7, PC3 and T24 cancer were double stained with CM-H<sub>2</sub>DCFDA and Nile Red for ROS and Lipid Droplet evaluation, respectively. In the right panel, a representative FACS plot of cells showing that the highest amount of ROS also corresponded to the highest number of LDs.

Fig. S3.

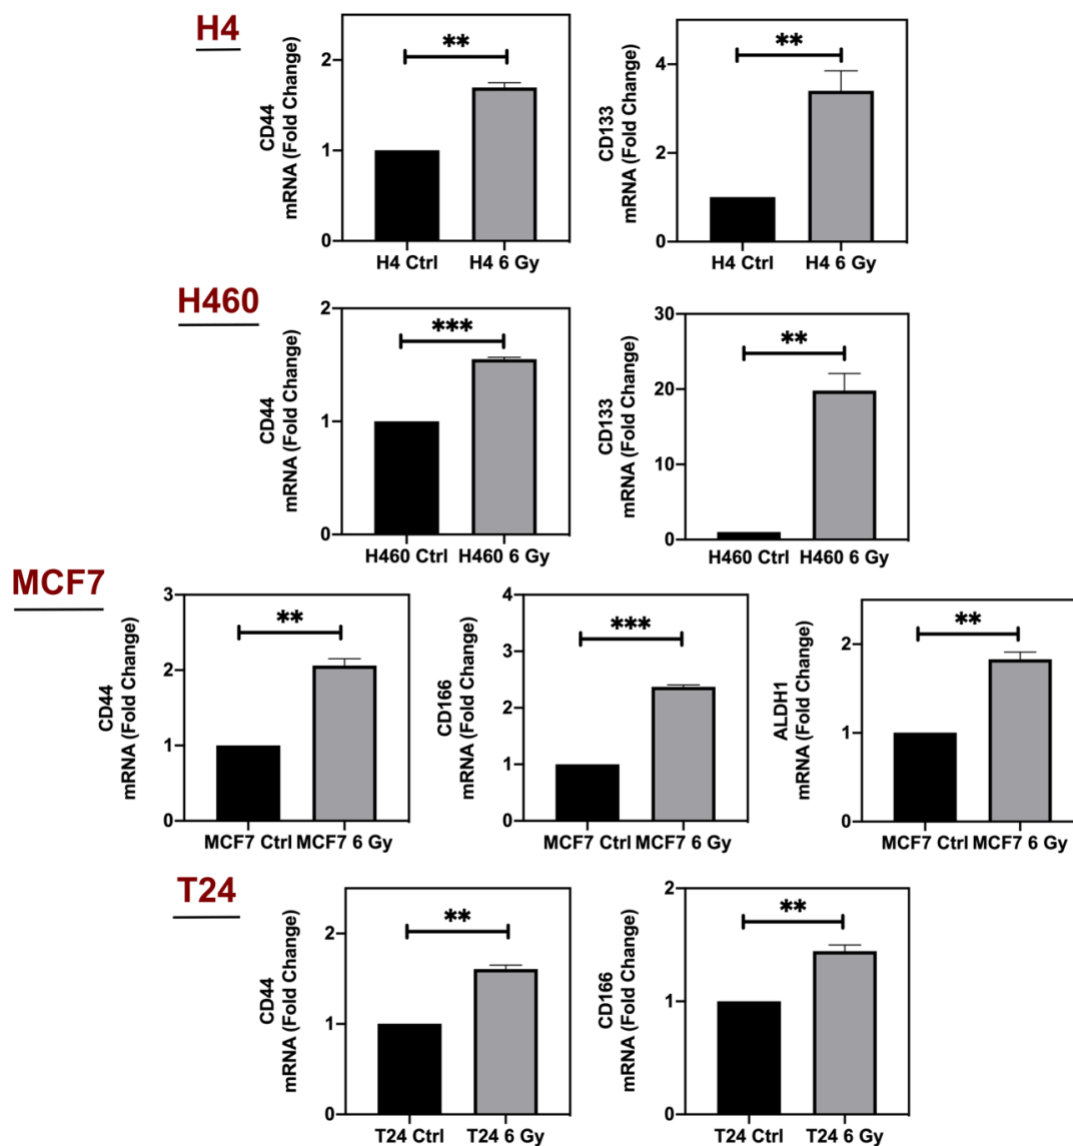

**Figure S3: CSC Marker Evaluation in 6 Gy Radioresistant Cells.** CD44, CD133, CD166 and ALDH1 mRNA expression in 6 Gy radioresistant H4, H460, MCF7, PC3 and T24 cancer cells as assessed by RT-qPCR. Only the significant genes are here reported. All data represent the means  $\pm$  SD from three independent experiments. \*  $\leq$  0.05; \*\*  $\leq$  0.01; \*\*\*  $\leq$  0.001 and \*\*\*\*  $\leq$  0.0001.



Fig. S4.

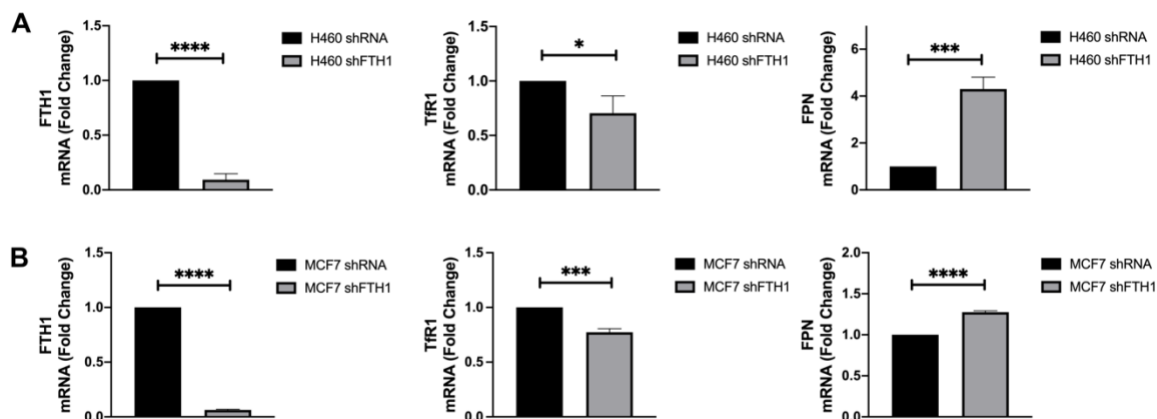

**Figure S2: FTH1 silencing in H460 and MCF7 causes TfR1 downregulation and FPN upregulation.** RT-qPCR analysis of H460 and MCF7 silenced for FTH1 shows TfR1 mRNA downregulation and FPN upregulation in both cell systems. All data represent the means  $\pm$  SD from three independent experiments. \*  $\leq$  0.05; \*\*  $\leq$  0.01; \*\*\*  $\leq$  0.001 and \*\*\*\*  $\leq$  0.0001.

**Table S1. Sequence of qRT-PCR primers used in this study**

|                 |                |                             |
|-----------------|----------------|-----------------------------|
| <b>GAPDH</b>    | <i>Forward</i> | 5'-GCATCCTGGGCTACACTGAG-3'  |
| <b>GAPDH</b>    | <i>Reverse</i> | 5'-AAAGTGGTCGTTGAGGGCA-3'   |
| <b>FTH1</b>     | <i>Forward</i> | 5'-CATCAACCGCCAGATCAAC-3'   |
| <b>FTH1</b>     | <i>Reverse</i> | 5'-GATGGCTTTTACCTGCTCAT-3'  |
| <b>TfR1</b>     | <i>Forward</i> | 5'-CTGGTAAACTGGTCCATGCT-3'  |
| <b>TfR1</b>     | <i>Reverse</i> | 5'-GTGATTTTCCCTGCTCTGAC-3'  |
| <b>FPN</b>      | <i>Forward</i> | 5'-GGTGTCTGTGTTTCTGGT-3'    |
| <b>FPN</b>      | <i>Reverse</i> | 5'-GTCTAGCATTCTTGTCCAC-3'   |
| <b>CD24</b>     | <i>Forward</i> | 5'-CCTGTCAGAGCTGTGTGGAC-3'  |
| <b>CD24</b>     | <i>Reverse</i> | 5'-GCTGGGTAGAGTGGTGTGT-3'   |
| <b>CD44</b>     | <i>Forward</i> | 5'-GGGTTCATAGAAGGGCACGT-3'  |
| <b>CD44</b>     | <i>Reverse</i> | 5'-GGGAGGTGTTGGATGTGAGG-3'  |
| <b>CD133</b>    | <i>Forward</i> | 5'-AAGCATTGGCATCTTCTATGG-3' |
| <b>CD133</b>    | <i>Reverse</i> | 5'-AGAGAGTTCGCAAGTCCTTG-3'  |
| <b>CD166</b>    | <i>Forward</i> | 5'-CGATGAGGCAGACGAGATAAG-3' |
| <b>CD166</b>    | <i>Reverse</i> | 5'-TAGACGACACCAGCAACAAG-3'  |
| <b>ALDH1</b>    | <i>Forward</i> | 5'-AACTGGAATGTGGAGGAGGC-3'  |
| <b>ALDH1</b>    | <i>Reverse</i> | 5'-ATGATTTGCTGCACTGGTCC-3'  |
| <b>PLIN1</b>    | <i>Forward</i> | 5'-GACAAGGAAGAGTCAGCCCC-3'  |
| <b>PLIN1</b>    | <i>Reverse</i> | 5'-GAGAGGGTGTGGTCAGAGC-3'   |
| <b>PLIN2</b>    | <i>Forward</i> | 5'-ACAGGGGTGATGGACAAGAC-3'  |
| <b>PLIN2</b>    | <i>Reverse</i> | 5'-ATCATCCGACTCCCCAAGAC-3'  |
| <b>PLIN3</b>    | <i>Forward</i> | 5'-CACCATGTTCCGGGACATTG-3'  |
| <b>PLIN3</b>    | <i>Reverse</i> | 5'-GCACCTGGTCCTTACATTG-3'   |
| <b>PLIN4</b>    | <i>Forward</i> | 5'-GTTCCAGGACCACAGACA-3'    |
| <b>PLIN4</b>    | <i>Reverse</i> | 5'-CCTACACTGAGCACATCC-3'    |
| <b>PLIN5</b>    | <i>Forward</i> | 5'-GATCACTTCCTGCCCATGAC-3'  |
| <b>PLIN5</b>    | <i>Reverse</i> | 5'-GCTGTCTCCTCTGATCCTCC-3'  |
| <b>SOD1</b>     | <i>Forward</i> | 5'-GCAGATGACTTGGGCAAAGG-3'  |
| <b>SOD1</b>     | <i>Reverse</i> | 5'-TGGGCGATCCCAATTACACC-3'  |
| <b>SOD2</b>     | <i>Forward</i> | 5'-CTGGAACCTCACATCAACGC-3'  |
| <b>SOD2</b>     | <i>Reverse</i> | 5'-CCTGGTACTTCTCCTCGGTG-3'  |
| <b>GPX1</b>     | <i>Forward</i> | 5'-CCCAAGCTCATCACCTGGTC-3'  |
| <b>GPX1</b>     | <i>Reverse</i> | 5'-TGTCAATGGTCTGGAAGCGG-3'  |
| <b>Catalase</b> | <i>Forward</i> | 5'-CGTGCTGAATGAGGAACAG-3'   |
| <b>Catalase</b> | <i>Reverse</i> | 5'-GACCGCTTCTTCTGGATG-3'    |
